# Supplementary material for: Levilactobacillus brevis with High Production of Putrescine Isolated from Blue Cheese and Its Application
Source: MDPI journal article supplement (doi:10.3390/ijms24119668), 2023-06-02
Supplement: s1 [file s1]

## Supplementary Materials

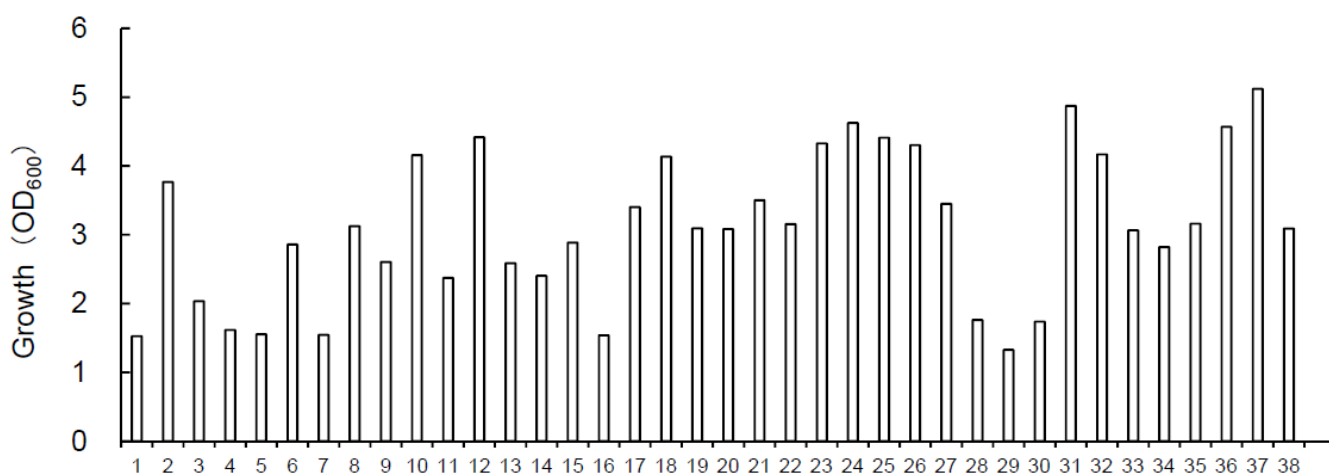

**Figure S1.** Growth of bacterial strains isolated from the blue cheese in MRS broth. Bacterial strains isolated from the blue cheese was inoculated in 500  $\mu$ L of MRS broth and incubated under anaerobic conditions for 48 h at 37 °C. At the end of the cultivation, the OD<sub>600</sub> values were measured.

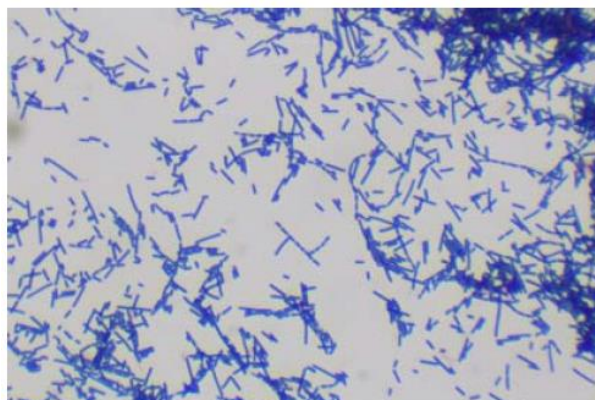

**Figure S2.** Gram-stained photograph of *L. brevis* FB215.

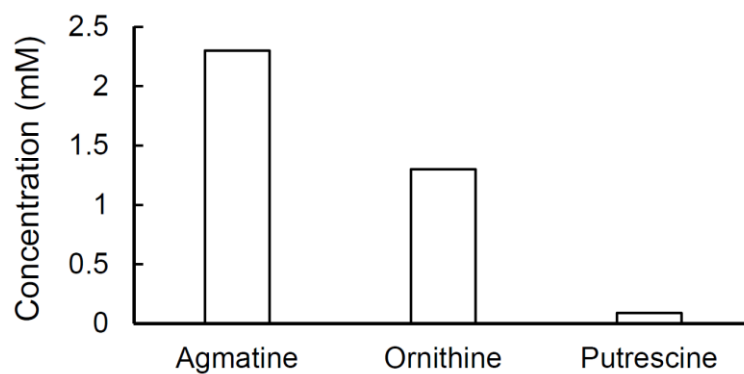

**Figure S3.** Concentration of polyamine precursors (ornithine and agmatine) and putrescine in Sakekasu extract. Ornithine, agmatine, and putrescine concentrations in the Sakekasu extract were determined by HPLCs.

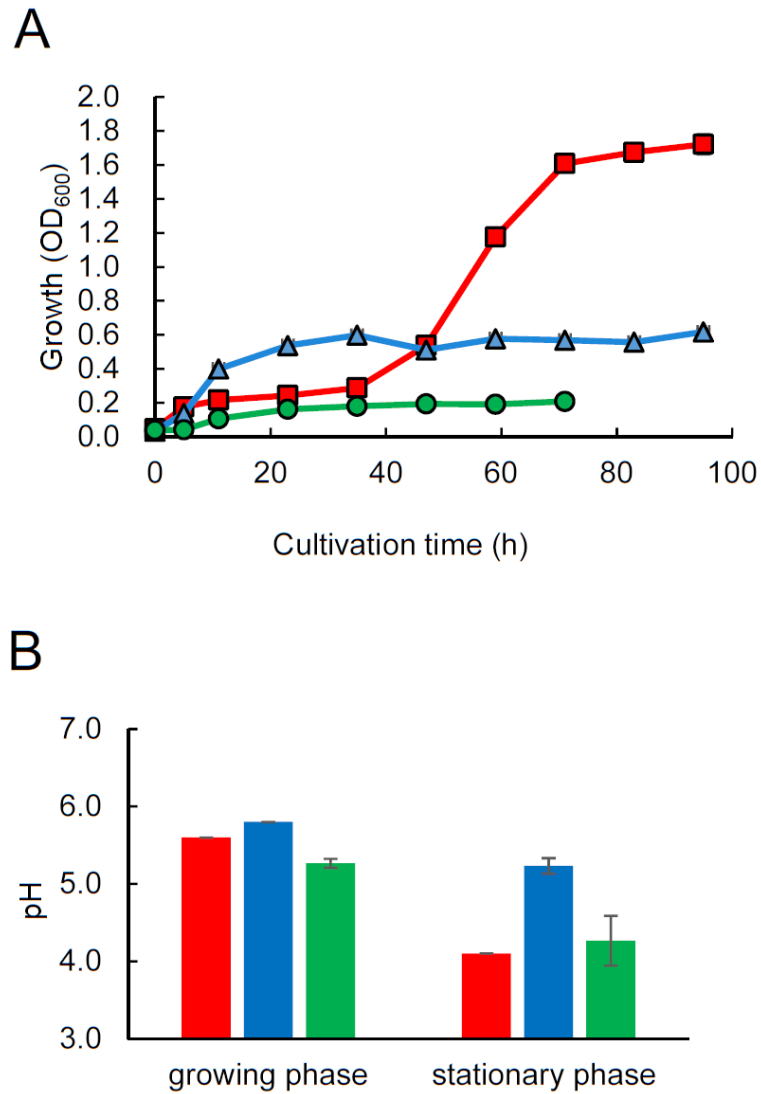

**Figure S4.** Growth of high polyamine-producing bacteria isolated from fermented foods grown in Sakekasu extract. *L. brevis* FB215, *S. epidermidis* FB146 [1], and *L. curvatus* KP3-4 [2] were inoculated in Sakekasu extract and incubated at 37 °C. (A) The OD<sub>600</sub> values of cultures at different growth phases were determined. (B) The pH of the different growth phases was measured. The pH of culture supernatant of *L. brevis* FB215, *S. epidermidis* FB146, and *L. curvatus* KP3-4 are represented by red, blue, and green bars, respectively ( $n = 3$ ).

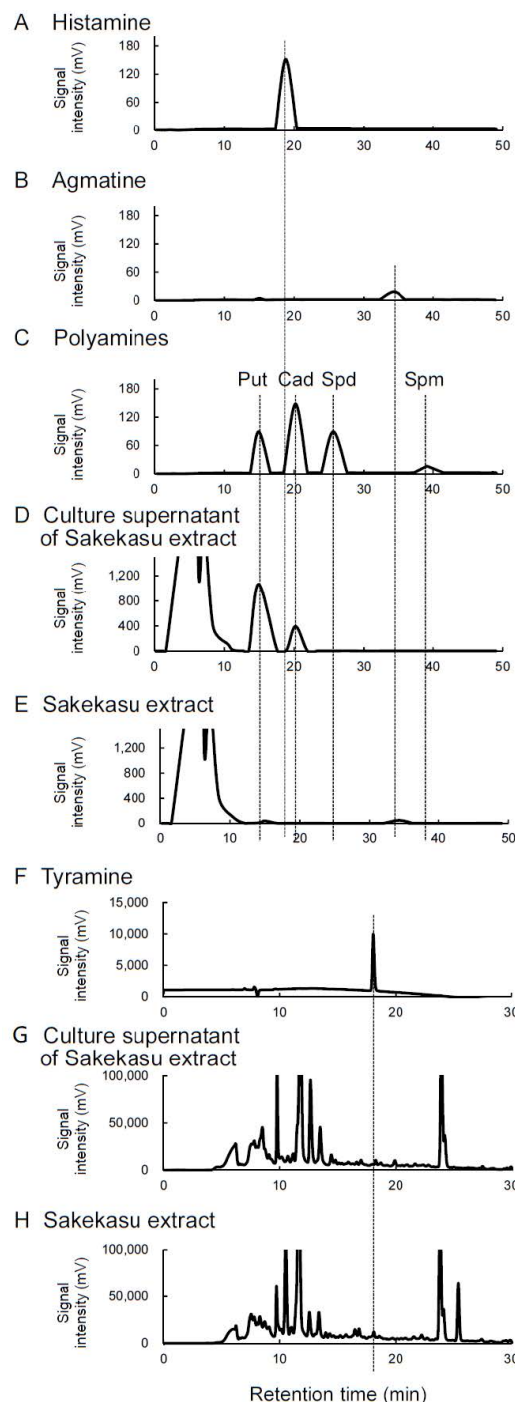

**Figure S5.** Analysis of metabolites in the supernatant of *L. brevis* FB215 cultured in Sakekasu extract. (A–C) show chromatograms of 100  $\mu$ M histamine, 100  $\mu$ M agmatine and 100  $\mu$ M polyamines, respectively. In (C), Put, Cad, Spd and Spm represent putrescine, cadaverine, spermidine and spermine, respectively. (D) and (E) are chromatograms of the culture supernatant of *L. brevis* FB215 cultured in Sakekasu extract for 96 hours and Sakekasu extract before inoculation, respectively. In (A–E), the HPLC system equipped with the #2619PH column was used. (F–H) show chromatograms of 100  $\mu$ M tyramine, culture supernatant of *L. brevis* FB215 cultured in Sakekasu extract, and Sakekasu extract before inoculation, respectively. In (F–H), the HPLC equipped with the Discovery HS F5 column was used.

## Reference

- Shirasawa, H.; Nishiyama, C.; Hirano, R.; Koyanagi, T.; Okuda, S.; Takagi, H.; Kurihara, S. Isolation of the high polyamine-producing bacterium *Staphylococcus epidermidis* FB146 from fermented foods and identification of polyamine-related genes. *Biosci. Microbiota, Food Heal.* **2023**, *42*, 24–33, <https://doi.org/10.12938/bmfh.2022-011>.
- Hirano, R.; Kume, A.; Nishiyama, C.; Honda, R.; Shirasawa, H.; Ling, Y.; Sugiyama, Y.; Nara, M.; Shimokawa, H.; Kawada, H.; et al. Putrescine Production by *Latilactobacillus curvatus* KP 3-4 Isolated from Fermented Foods. *Microorganisms* **2022**, *10*, 697, <https://doi.org/10.3390/microorganisms10040697>.
